# Supplementary material
Source: publisher figshare collection journal article supplement (https://frontiersin.figshare.com/ndownloader/files/34915059)
Supplement: Supplementary file 2 [file 34915059]

## Std Size

|        |                          |   |
|--------|--------------------------|---|
| 样品ID:  | 1                        | 2 |
| 采样ID:  | 1                        |   |
| 产品编号:  |                          |   |
| 总细胞浓度: | 2.30*10 <sup>6</sup> /ml |   |
| 总细胞数:  |                          |   |
| 平均直径:  | 19.42μm                  |   |
| 结团率:   | 8.37%                    |   |

|        |                          |
|--------|--------------------------|
| 用户ID:  | user                     |
| 测量时间:  | 2020/11/17 17:47:53      |
| 稀释比例:  | 1:1                      |
| 活细胞浓度: | 2.21*10 <sup>6</sup> /ml |
| 细胞活率:  | 96.04%                   |
| 平均圆度:  | 0.78                     |

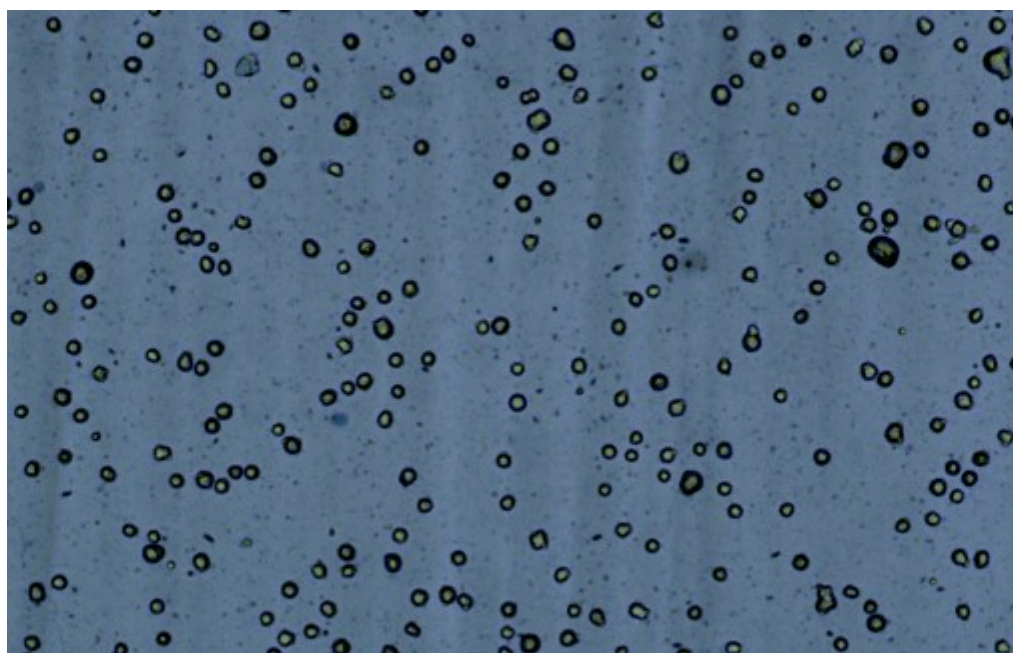

采样图

细胞直径分布图

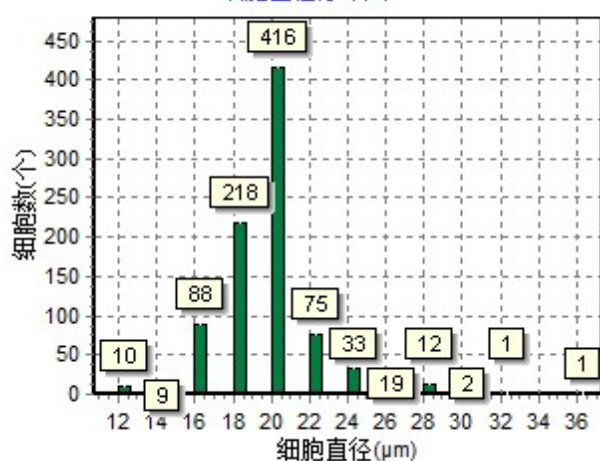

细胞直径分布图

聚团分布图

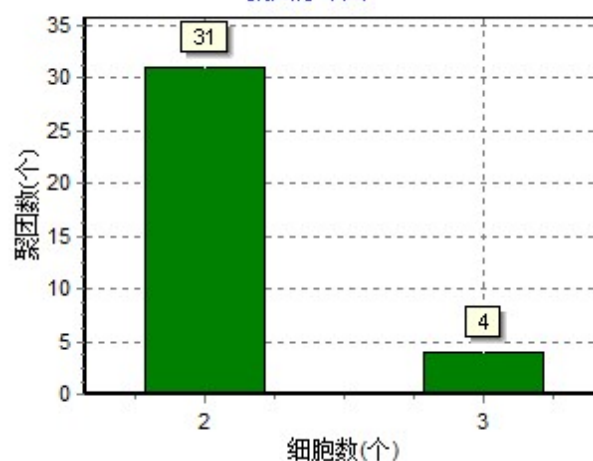

聚团分布图
