# Supplementary material
Source: publisher figshare collection journal article supplement (https://frontiersin.figshare.com/ndownloader/files/34915059)
Supplement: Supplementary file 3 [file 34915059]

## Std Size

|        |                              |
|--------|------------------------------|
| 样品ID:  | 3 1                          |
| 采样ID:  | 1                            |
| 产品编号:  |                              |
| 总细胞浓度: | $3.22 \times 10^6/\text{ml}$ |
| 总细胞数:  |                              |
| 平均直径:  | $17.60 \mu\text{m}$          |
| 结团率:   | 15.09%                       |

|        |                              |
|--------|------------------------------|
| 用户ID:  | user                         |
| 测量时间:  | 2020/11/17 17:50:01          |
| 稀释比例:  | 1:1                          |
| 活细胞浓度: | $2.64 \times 10^6/\text{ml}$ |
| 细胞活率:  | 81.92%                       |
| 平均圆度:  | 0.79                         |

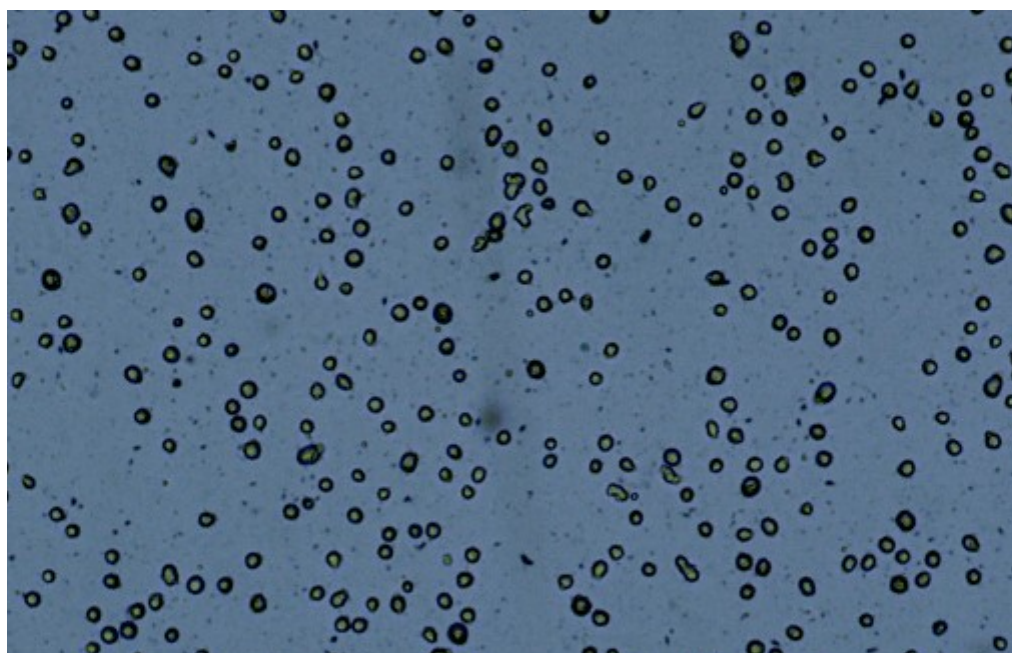

采样图

细胞直径分布图

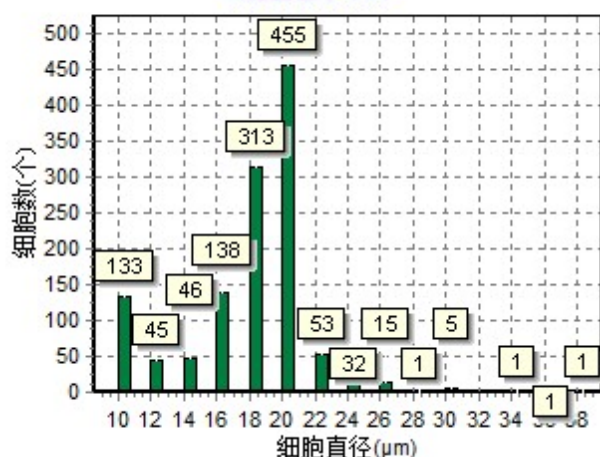

细胞直径分布图

聚团分布图

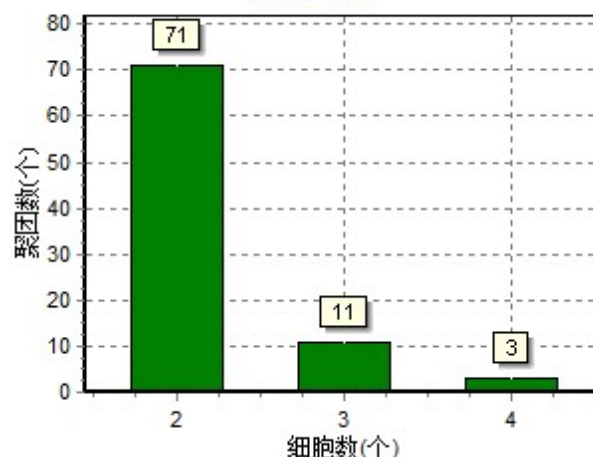

聚团分布图
